# Supplementary material for: Studies on the Selective Syntheses of Sodium Ditelluride and Dialkyl Ditellurides
Source: MDPI journal article supplement (doi:10.3390/molecules27248991), 2022-12-16
Supplement: s1 [file s1]

**Supplementary data**  
**for**  
**Studies on the Selective Synthesis of Disodium Ditelluride and**  
**Diorganyl Ditellurides**

Chorong Kim, Yoo Jin Lim, Ye Eun Kim, Hyunsung Cho, and Sang Hyup Lee \*

College of Pharmacy and Innovative Drug Center, Duksung Women's University, Seoul

01369, Republic of Korea,

\*sanghyup@duksung.ac.kr

|                                                                                         |     |
|-----------------------------------------------------------------------------------------|-----|
| Figure S1. <sup>1</sup> H and <sup>13</sup> C NMR spectrum of compound <b>1a</b> .....  | S2  |
| Figure S2. <sup>1</sup> H and <sup>13</sup> C NMR spectrum of compound <b>1b</b> .....  | S3  |
| Figure S3. <sup>1</sup> H and <sup>13</sup> C NMR spectrum of compound <b>1c</b> .....  | S4  |
| Figure S4. <sup>1</sup> H and <sup>13</sup> C NMR spectrum of compound <b>1d</b> .....  | S5  |
| Figure S5. <sup>1</sup> H and <sup>13</sup> C NMR spectrum of compound <b>1e</b> .....  | S6  |
| Figure S6. <sup>1</sup> H and <sup>13</sup> C NMR spectrum of compound <b>1f</b> .....  | S7  |
| Figure S7. <sup>1</sup> H and <sup>13</sup> C NMR spectrum of compound <b>1g</b> .....  | S8  |
| Figure S8. <sup>1</sup> H and <sup>13</sup> C NMR spectrum of compound <b>1h</b> .....  | S9  |
| Figure S9. <sup>1</sup> H and <sup>13</sup> C NMR spectrum of compound <b>1i</b> .....  | S10 |
| Figure S10. <sup>1</sup> H and <sup>13</sup> C NMR spectrum of compound <b>1j</b> ..... | S11 |
| Figure S11. <sup>1</sup> H and <sup>13</sup> C NMR spectrum of compound <b>1k</b> ..... | S12 |
| Figure S12. <sup>1</sup> H and <sup>13</sup> C NMR spectrum of compound <b>1l</b> ..... | S13 |
| Figure S13. <sup>1</sup> H and <sup>13</sup> C NMR spectrum of compound <b>1m</b> ..... | S14 |

KCR-613-A, 4.2 mg, CDCl<sub>3</sub>

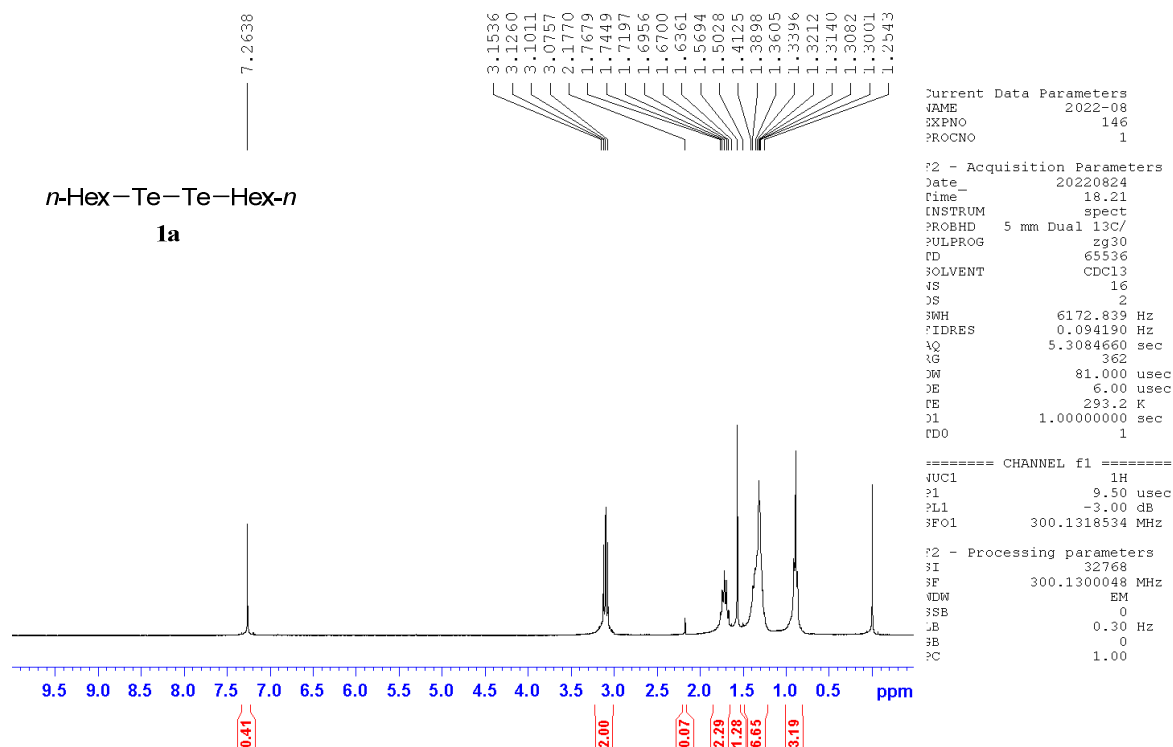

**Figure S1a.** <sup>1</sup>H NMR spectrum (300 MHz, CDCl<sub>3</sub>) of compound **1a**.

KCR-613-A, 7.6 mg, CDCl<sub>3</sub>

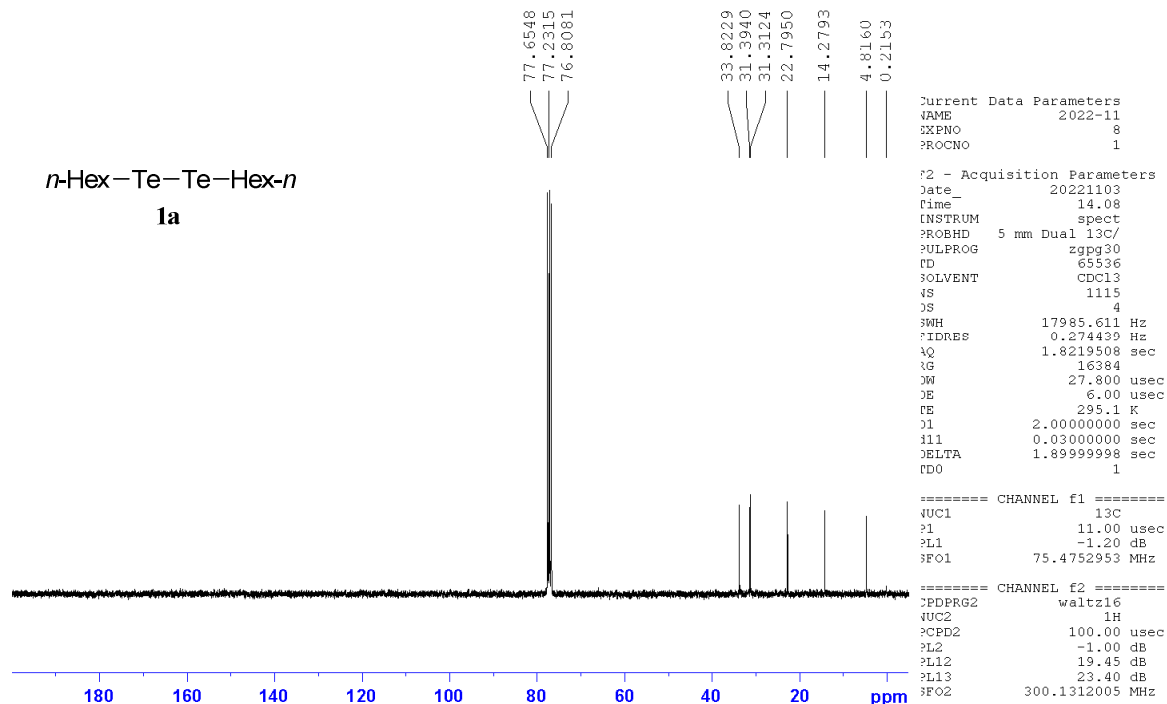

**Figure S1b.** <sup>13</sup>C NMR spectrum (75 MHz, CDCl<sub>3</sub>) of compound **1a**.

KCR-628-A, 3.3 mg, CDCl<sub>3</sub>

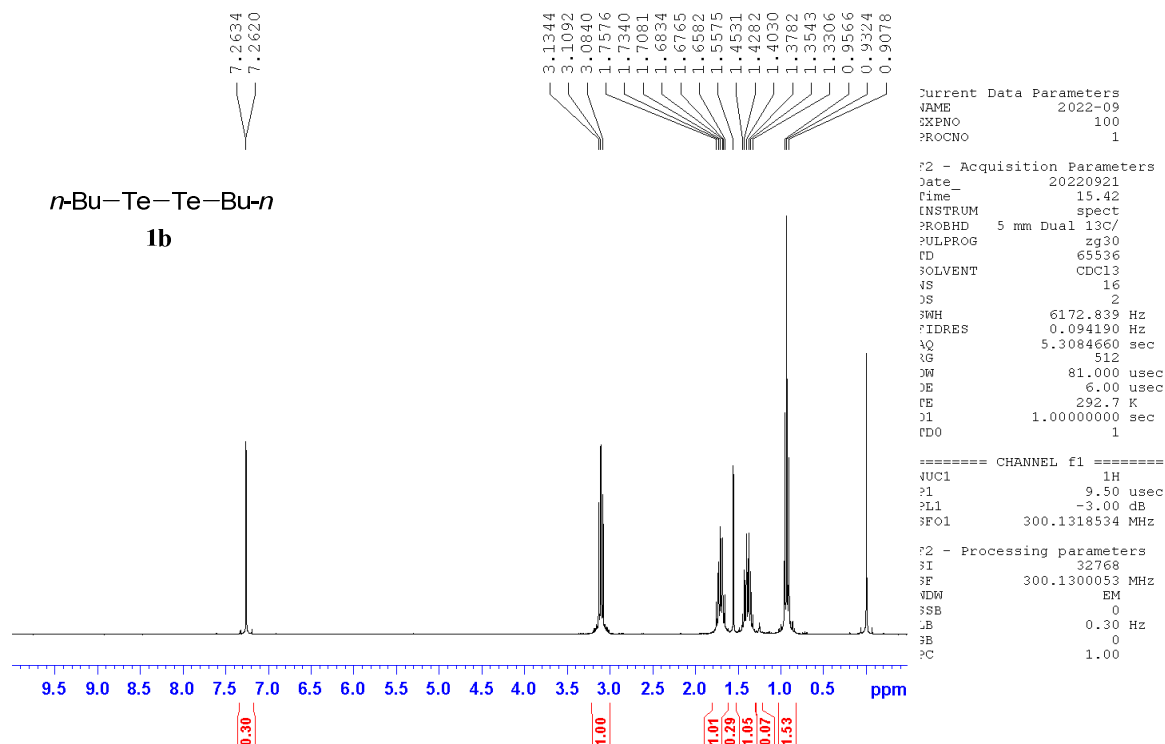

**Figure S2a.** <sup>1</sup>H NMR spectrum (300 MHz, CDCl<sub>3</sub>) of compound **1b**.

KCR-540-A, 8.78mg, CDCl<sub>3</sub>

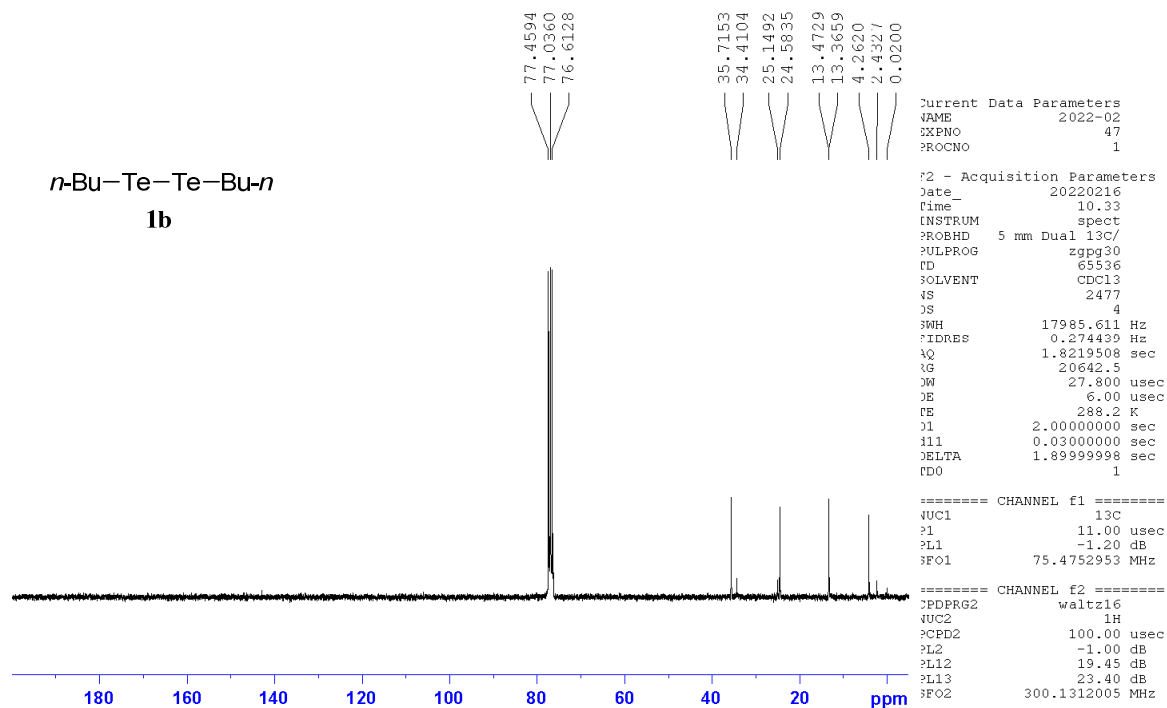

**Figure S2b.** <sup>13</sup>C NMR spectrum (75 MHz, CDCl<sub>3</sub>) of compound **1b**.

KCR-629-A, 3.6 mg, CDCl<sub>3</sub>

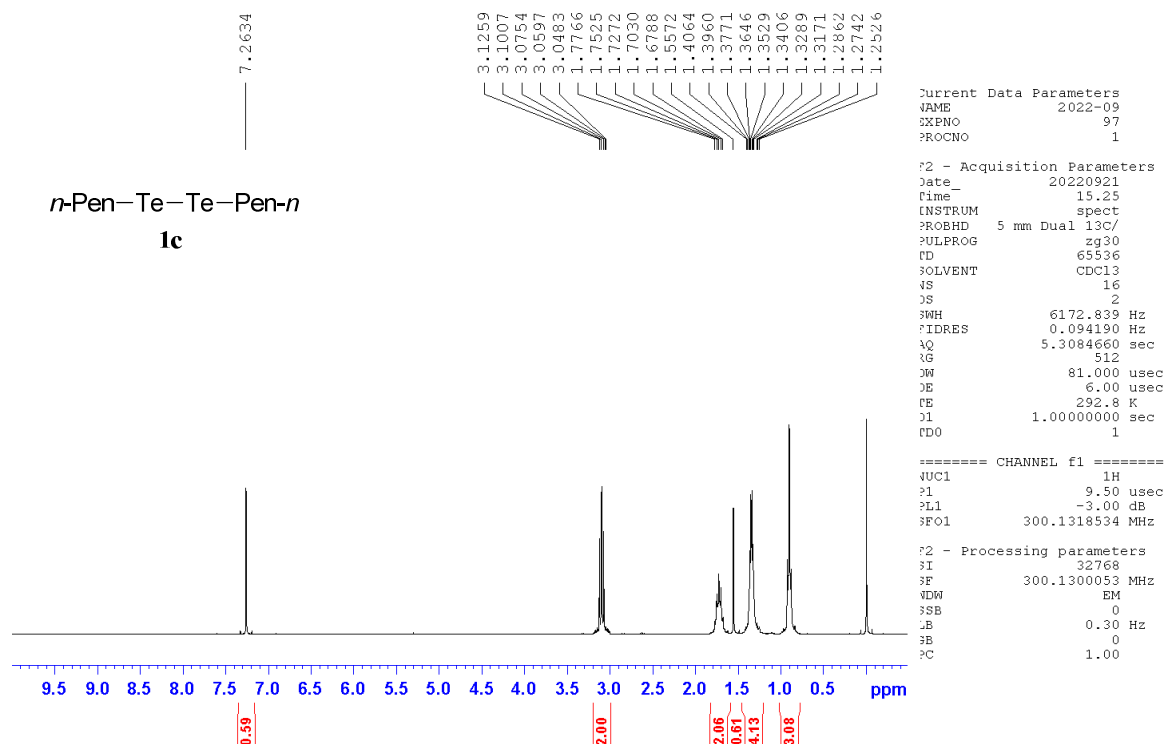

**Figure S3a.** <sup>1</sup>H NMR spectrum (300 MHz, CDCl<sub>3</sub>) of compound **1c**.

KCR-518-A, 9.5 mg, CDCl<sub>3</sub>

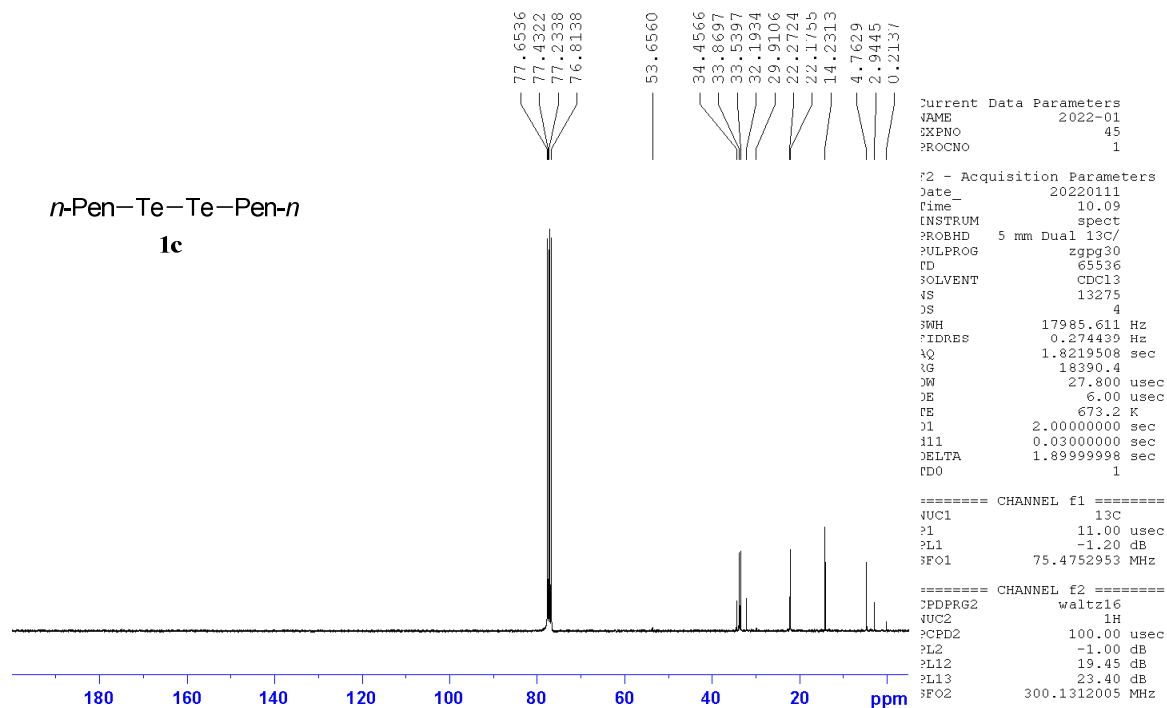

**Figure S3b.** <sup>13</sup>C NMR spectrum (75 MHz, CDCl<sub>3</sub>) of compound **1c**.

KCR-630-A, 4.1 mg, CDCl<sub>3</sub>

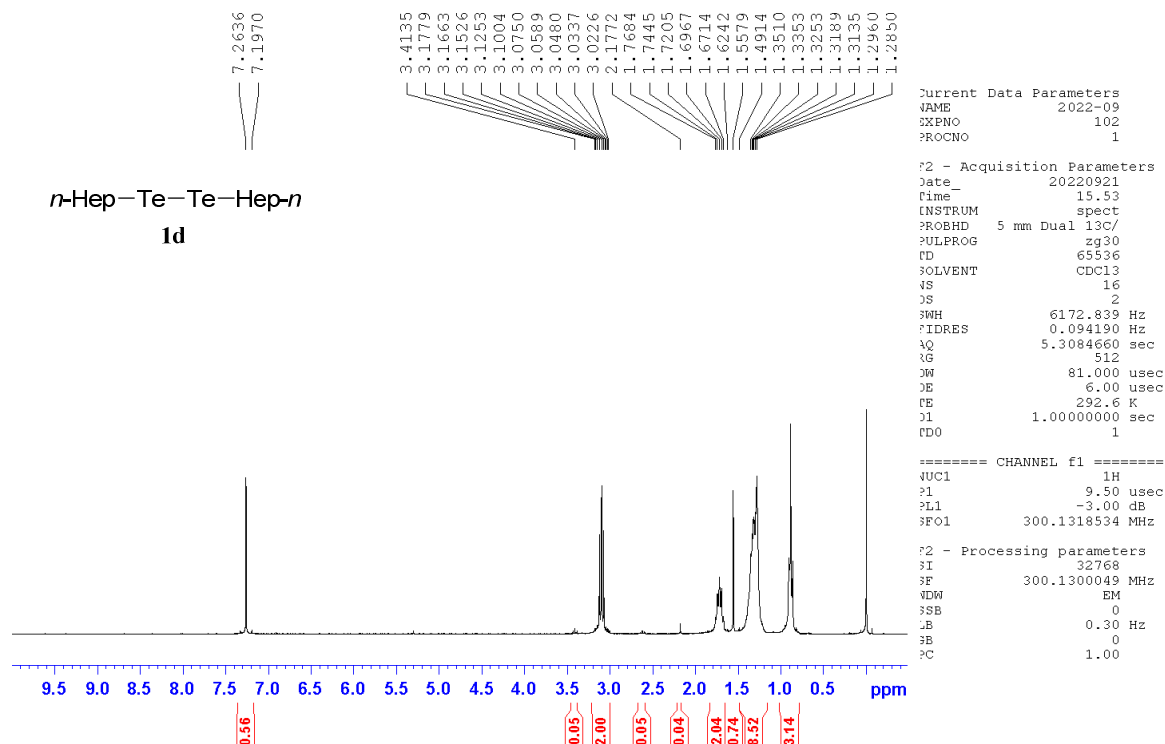

**Figure S4a.** <sup>1</sup>H NMR spectrum (300 MHz, CDCl<sub>3</sub>) of compound **1d**.

KCR-519-A, 7.3 mg, CDCl<sub>3</sub>

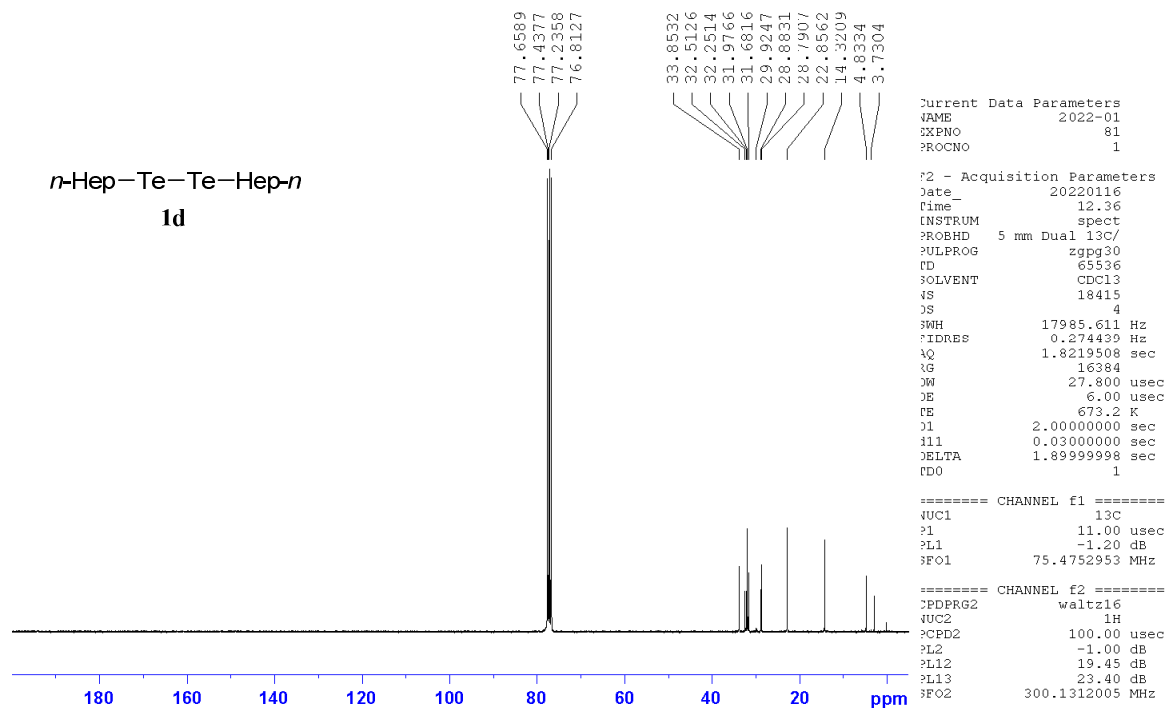

**Figure S4b.** <sup>13</sup>C NMR spectrum (75 MHz, CDCl<sub>3</sub>) of compound **1d**.

KCR-523-A, 3.6 mg, CDCl<sub>3</sub>

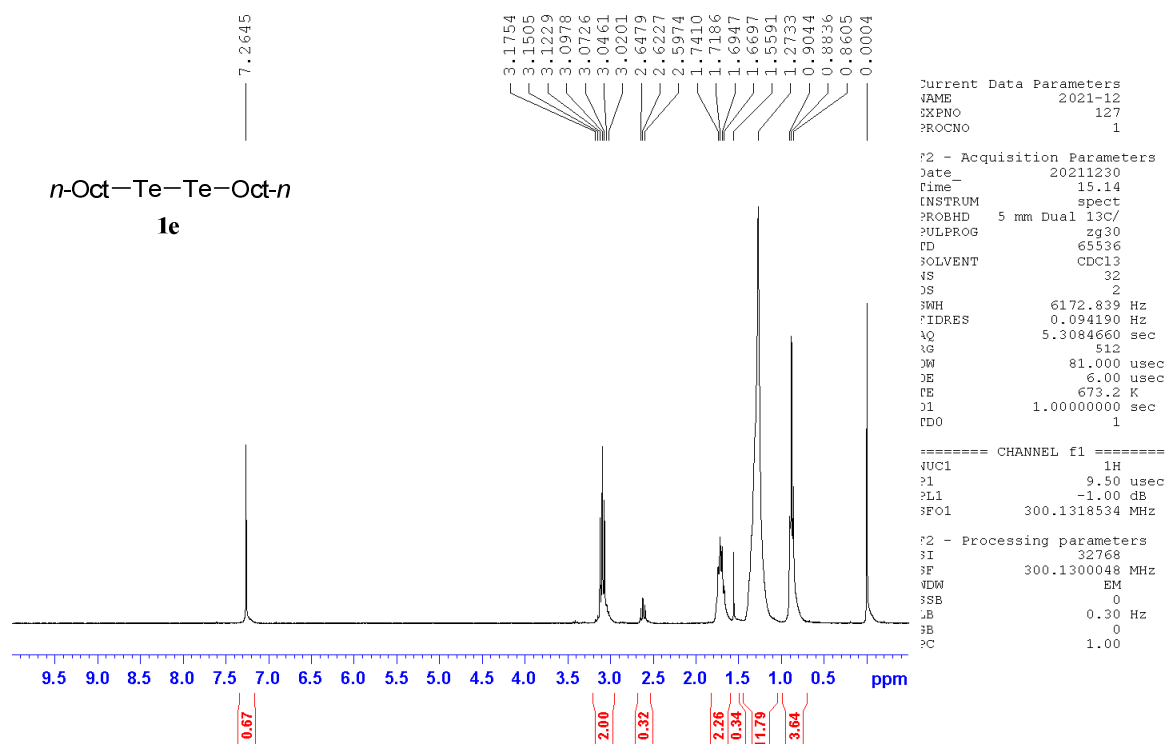

**Figure S5a.** <sup>1</sup>H NMR spectrum (300 MHz, CDCl<sub>3</sub>) of compound **1e**.

KCR-523-A, 7.0 mg, CDCl<sub>3</sub>

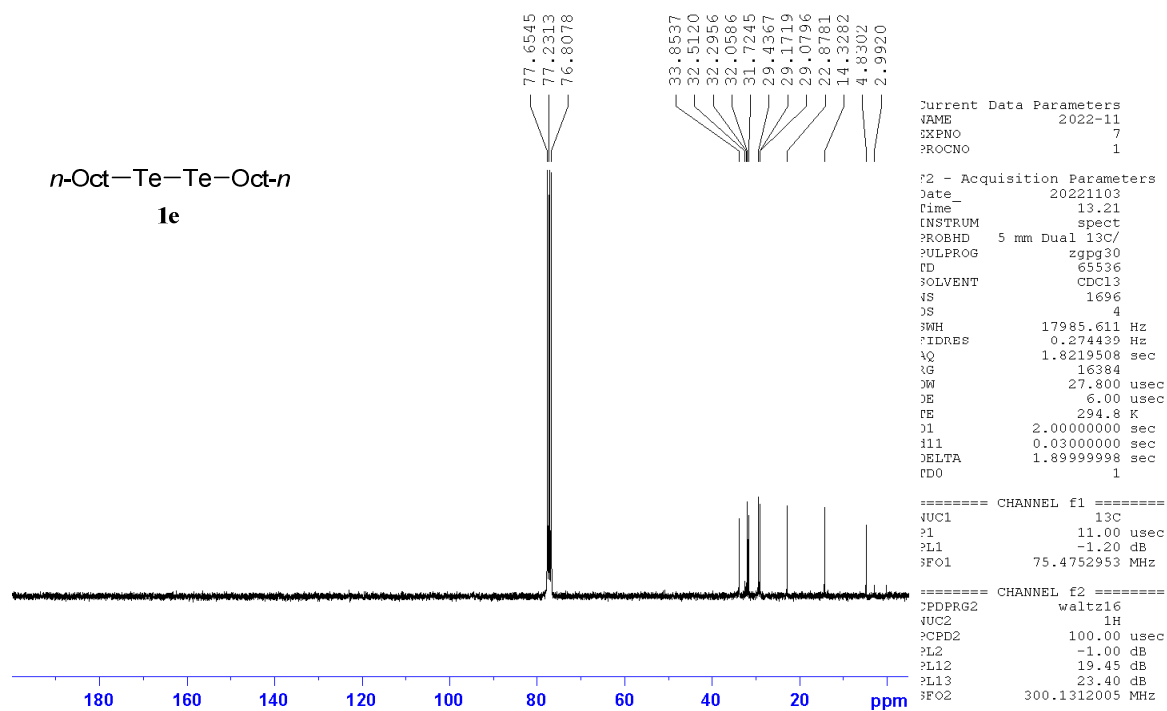

**Figure S5b.** <sup>13</sup>C NMR spectrum (75 MHz, CDCl<sub>3</sub>) of compound **1e**.

KCR-538-A, 3.6 mg, CDCl<sub>3</sub>

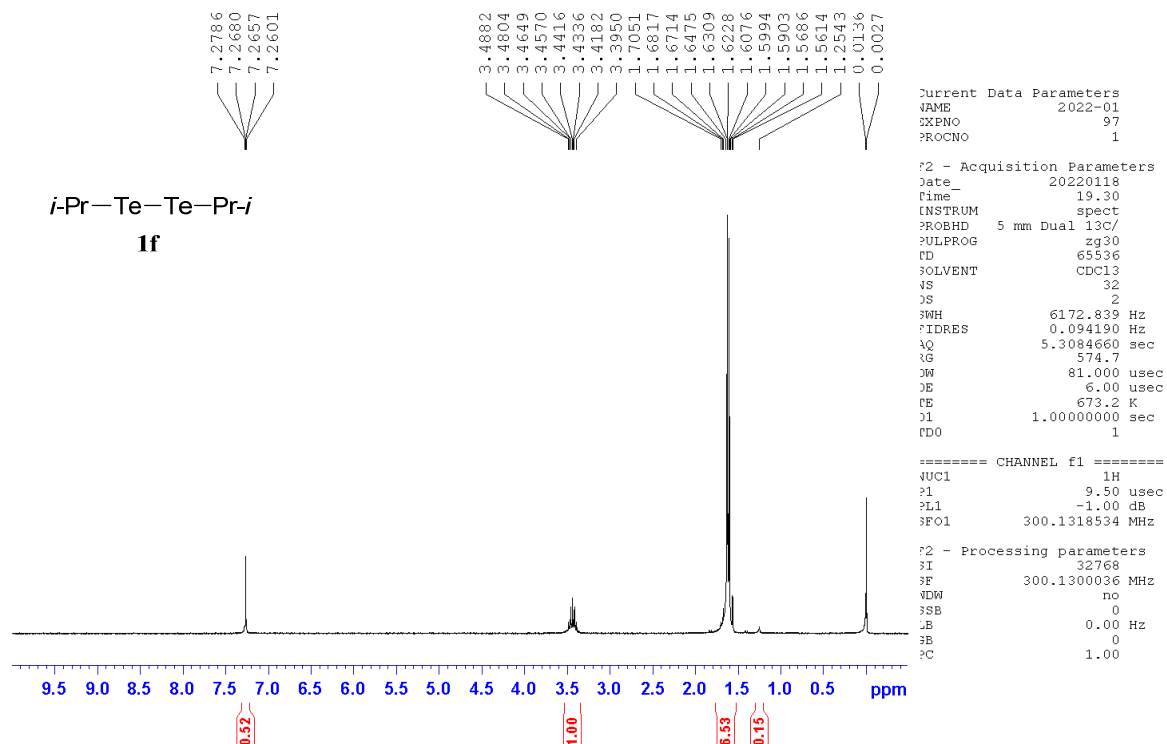

**Figure S6a.** <sup>1</sup>H NMR spectrum (300 MHz, CDCl<sub>3</sub>) of compound **1f**.

KCR-538-A, 8.1 mg, CDCl<sub>3</sub>

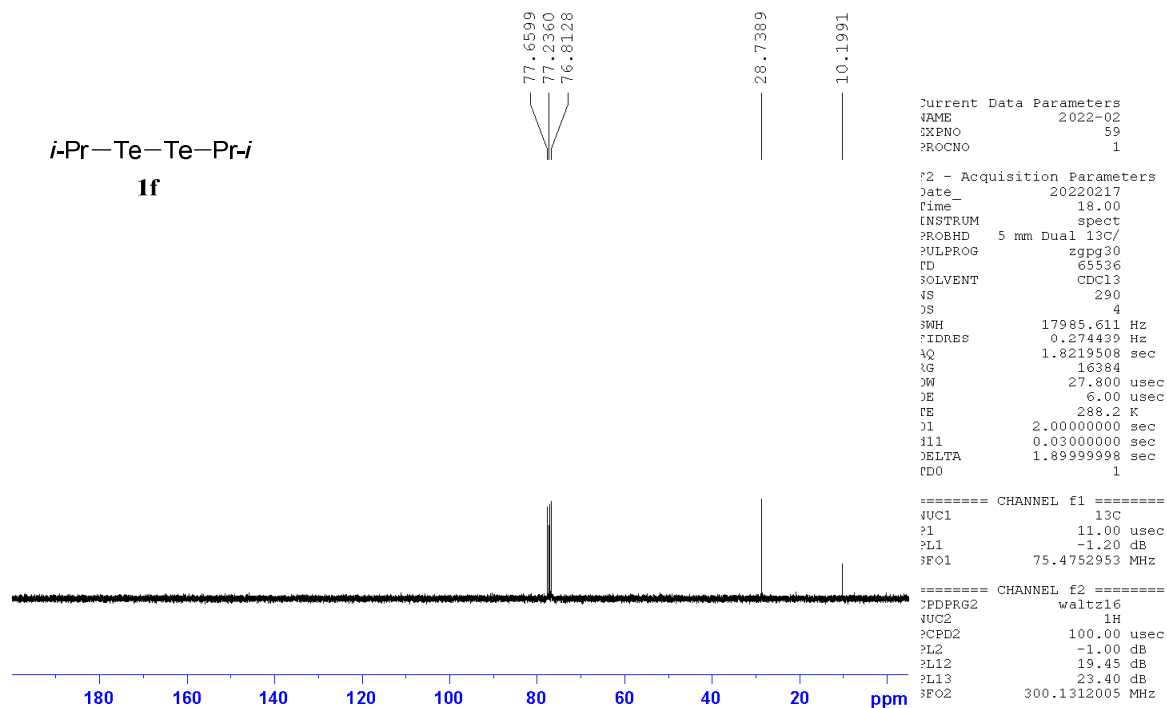

**Figure S6b.** <sup>13</sup>C NMR spectrum (75 MHz, CDCl<sub>3</sub>) of compound **1f**.

KCR-639-A, 3.0 mg, CDCl<sub>3</sub>

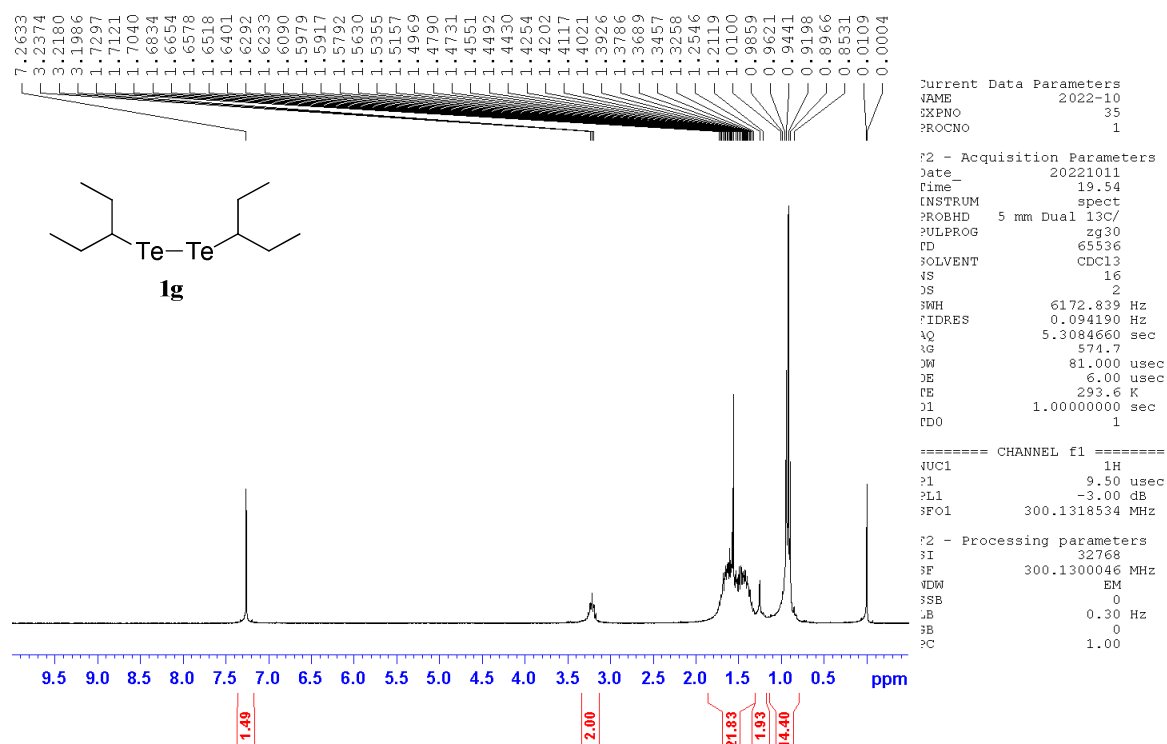

**Figure S7a.** <sup>1</sup>H NMR spectrum (300 MHz, CDCl<sub>3</sub>) of compound **1g**.

KCR-639-A, 7.0 mg, CDCl<sub>3</sub>

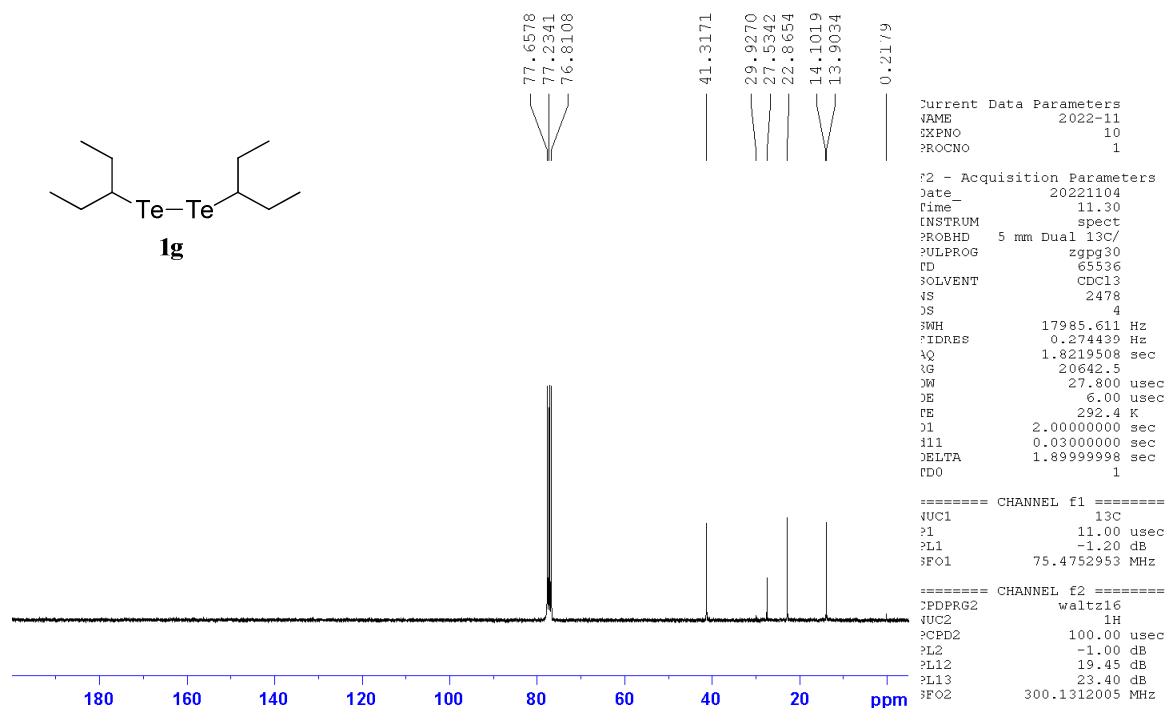

**Figure S7b.** <sup>13</sup>C NMR spectrum (75 MHz, CDCl<sub>3</sub>) of compound **1g**.



KCR-640-A, 4.1 mg, CDCl<sub>3</sub>

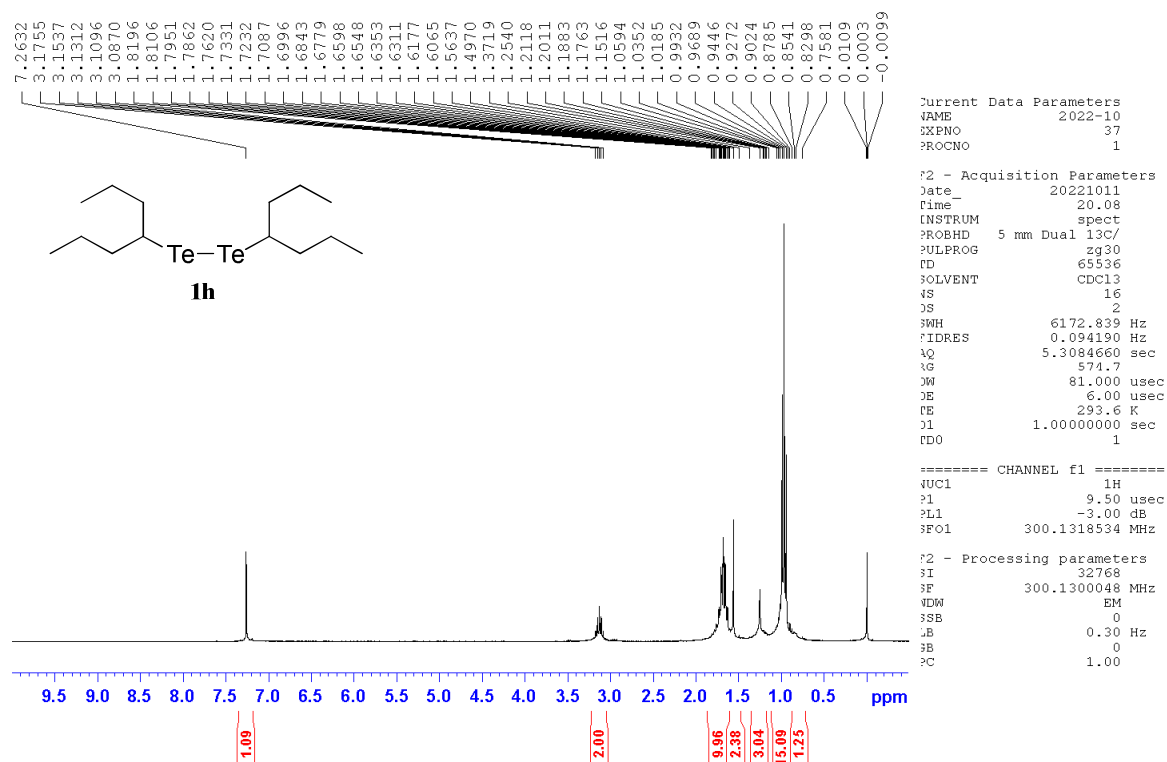

**Figure S8a.** <sup>1</sup>H NMR spectrum (300 MHz, CDCl<sub>3</sub>) of compound **1h**.

KCR-640-A, 7.6 mg, CDCl<sub>3</sub>

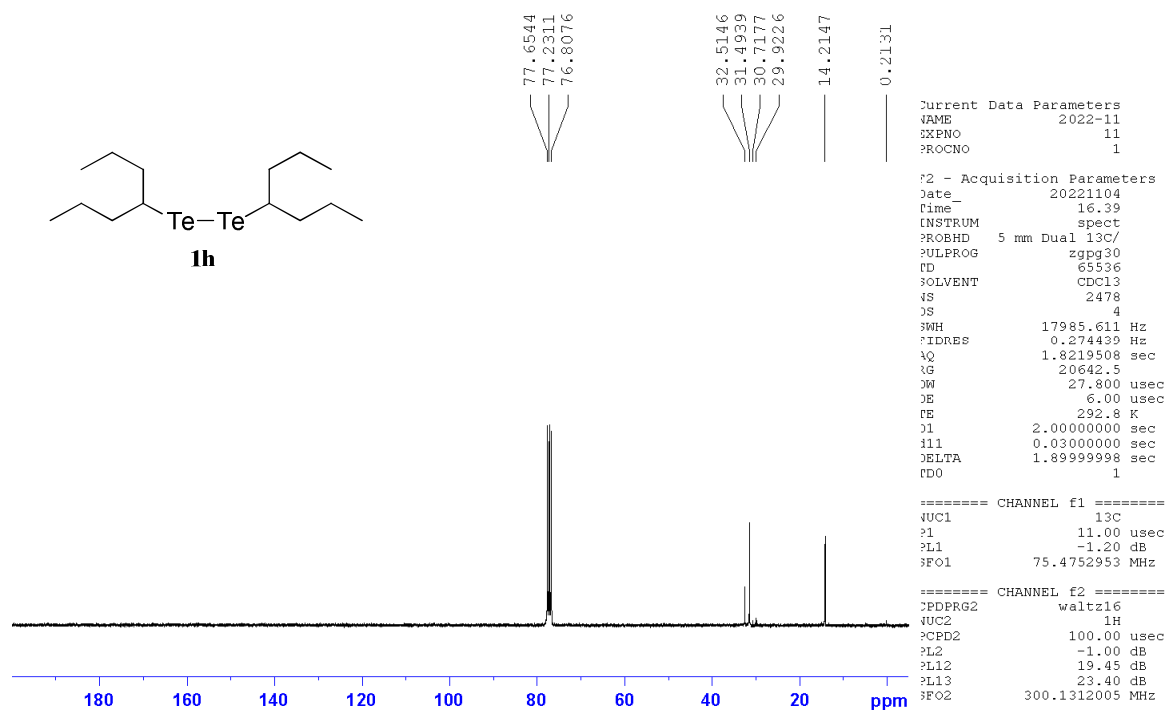

**Figure S8b.** <sup>13</sup>C NMR spectrum (75 MHz, CDCl<sub>3</sub>) of compound **1h**.

KCR-561-A, 3.9 mg, CDCl<sub>3</sub>

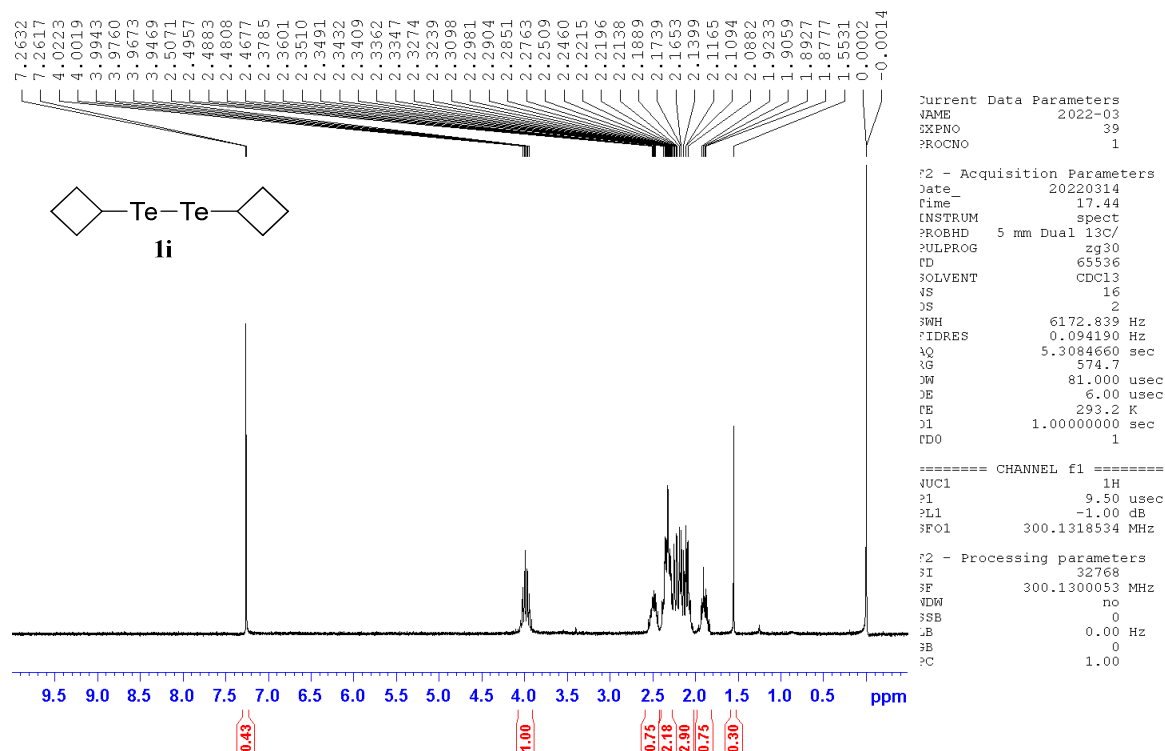

**Figure S9a.** <sup>1</sup>H NMR spectrum (300 MHz, CDCl<sub>3</sub>) of compound **1i**.

KCR-561-A, 5.6 mg, CDCl<sub>3</sub>

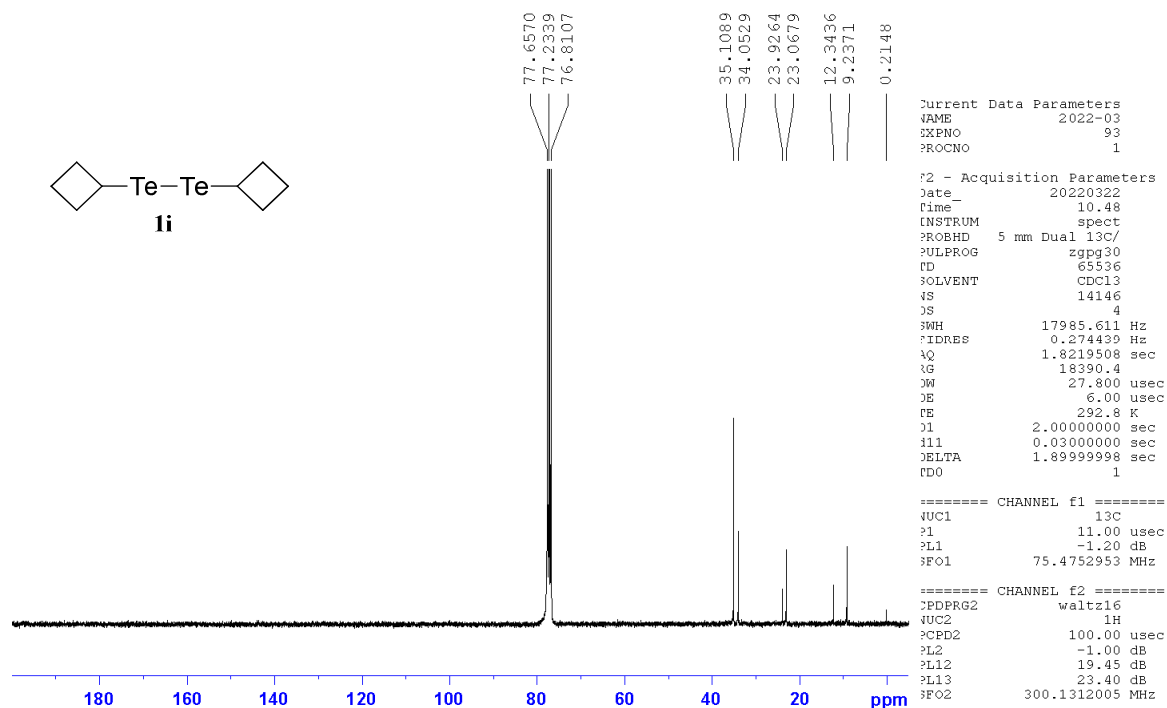

**Figure S9b.** <sup>13</sup>C NMR spectrum (75 MHz, CDCl<sub>3</sub>) of compound **1i**.

KCR-632-A, 3.0 mg, CDCl<sub>3</sub>

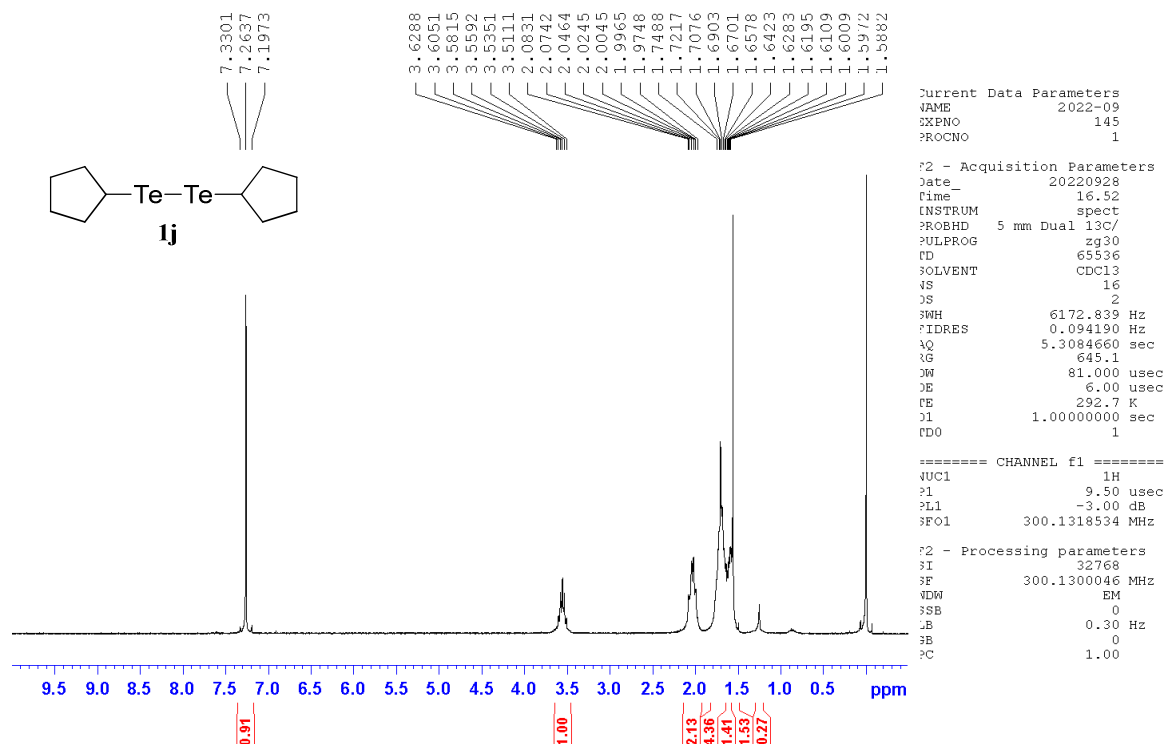

**Figure S10a.** <sup>1</sup>H NMR spectrum (300 MHz, CDCl<sub>3</sub>) of compound **1j**.

KCR-520-A, 6.6 mg, CDCl<sub>3</sub>

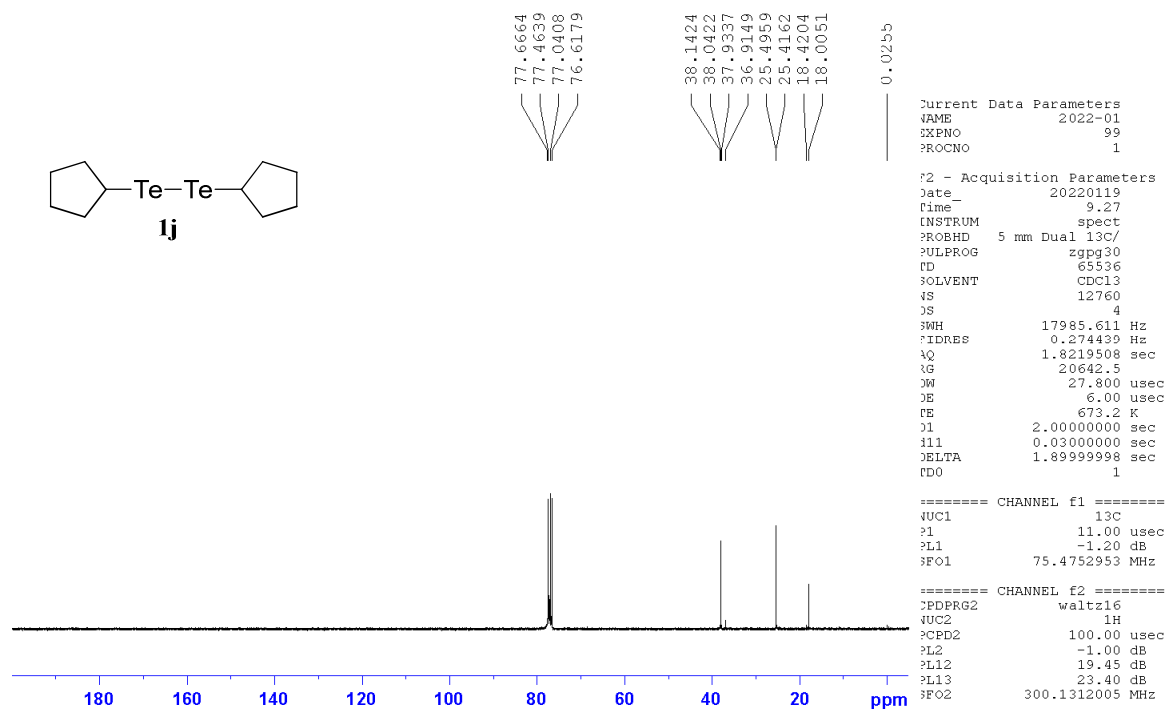

**Figure S10b.** <sup>13</sup>C NMR spectrum (75 MHz, CDCl<sub>3</sub>) of compound **1j**.

KCR-633-A, 3.6 mg, CDCl<sub>3</sub>

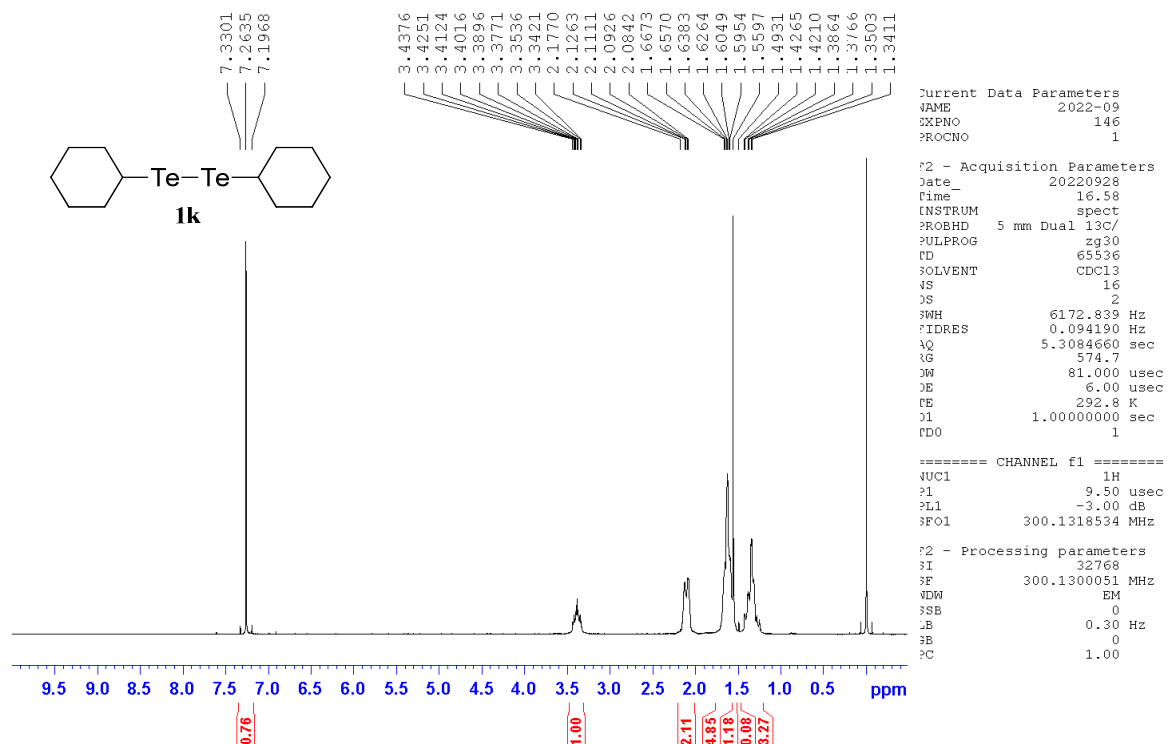

**Figure S11a.** <sup>1</sup>H NMR spectrum (300 MHz, CDCl<sub>3</sub>) of compound **1k**.

KCR-528-A, 3.5 mg, CDCl<sub>3</sub>

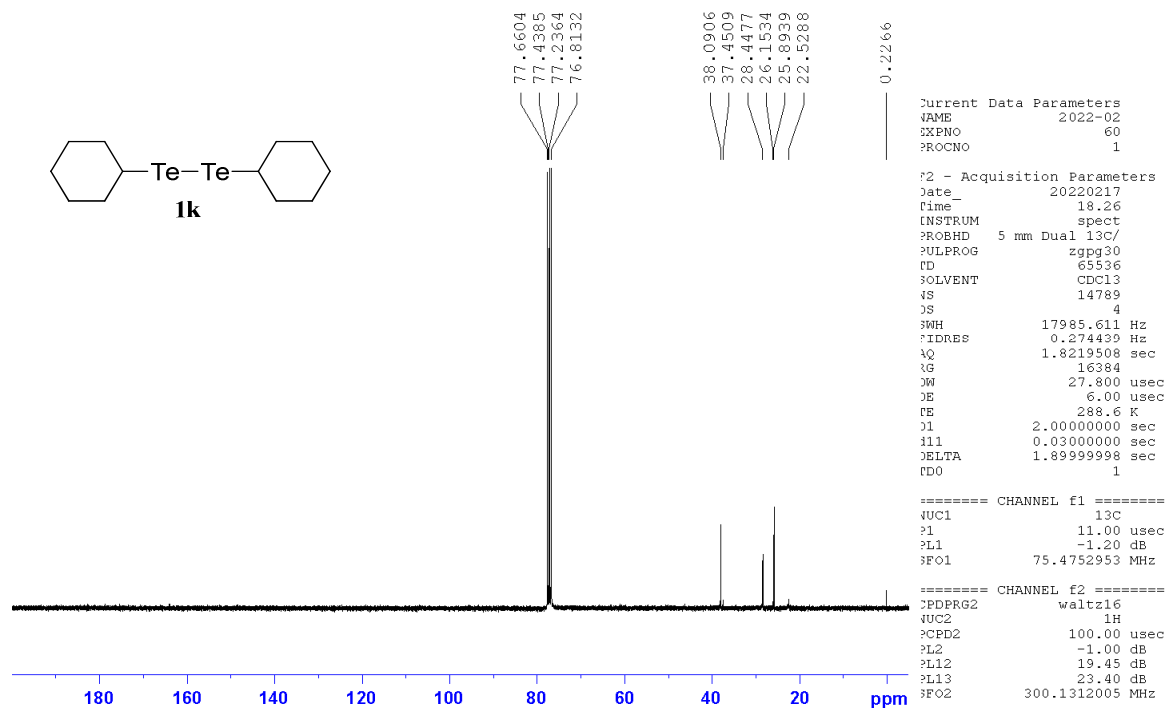

**Figure S11b.** <sup>13</sup>C NMR spectrum (75 MHz, CDCl<sub>3</sub>) of compound **1k**.

KCR-634-A, 4.0 mg, CDCl<sub>3</sub>

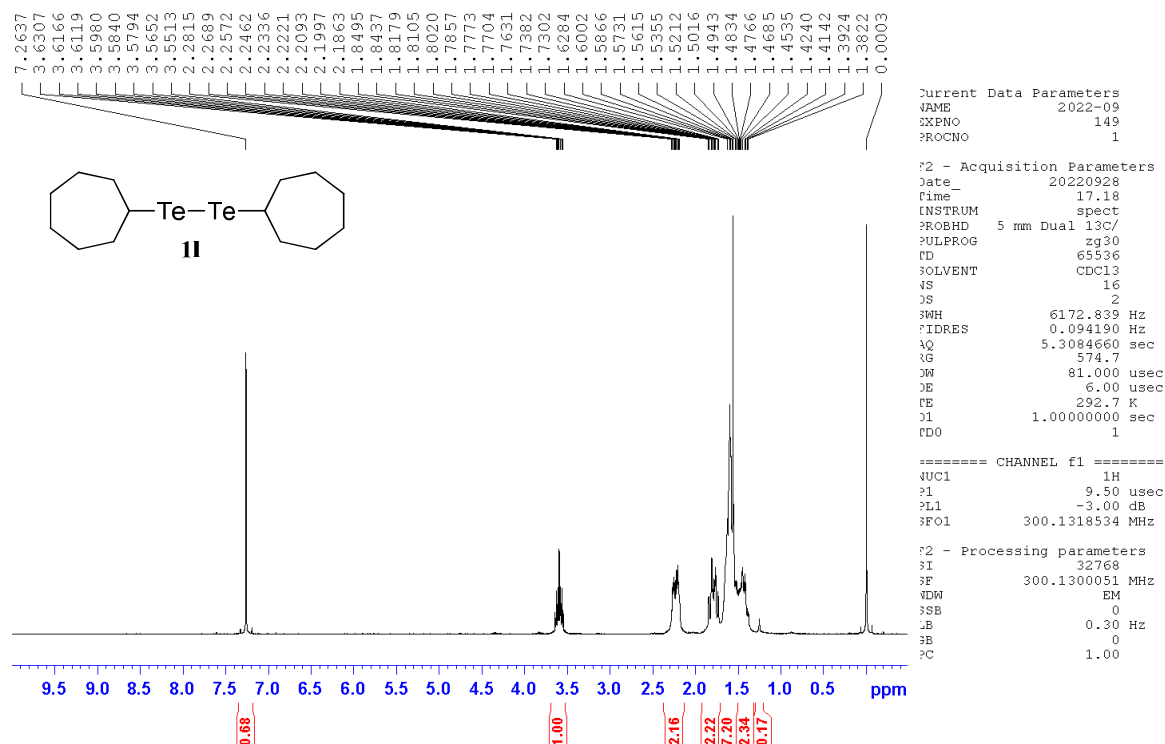

**Figure S12a.** <sup>1</sup>H NMR spectrum (300 MHz, CDCl<sub>3</sub>) of compound **11**.

KCR-524-A, 7.6 mg, CDCl<sub>3</sub>

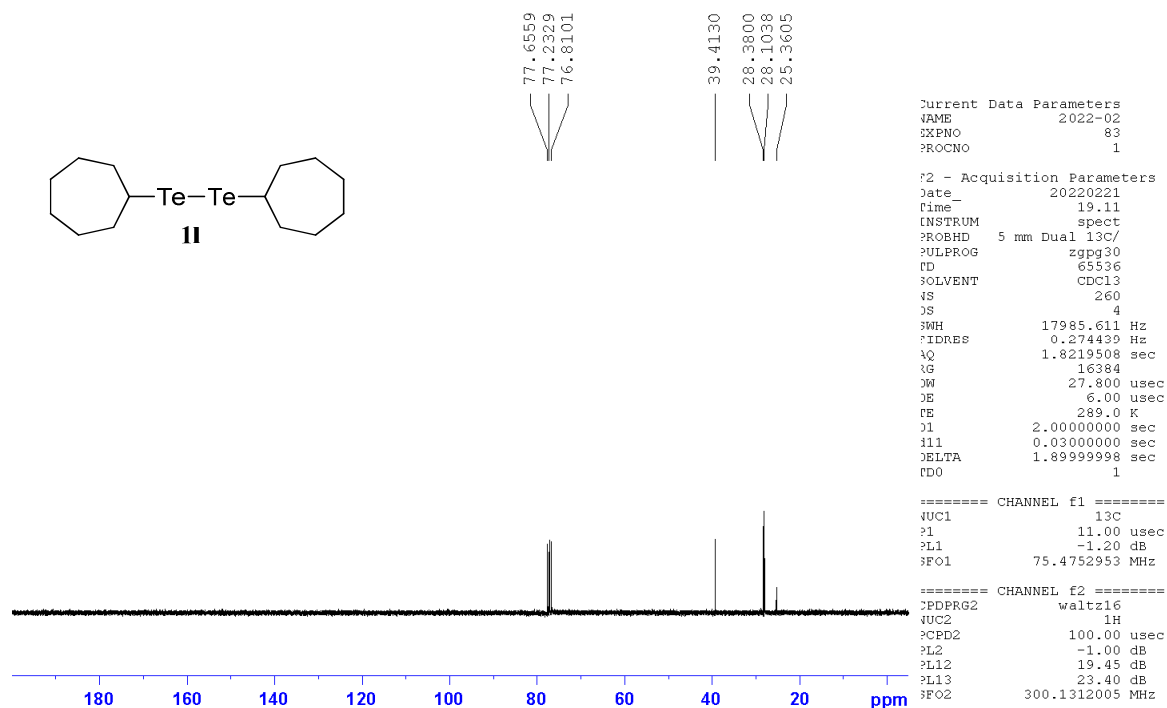

**Figure S12b.** <sup>13</sup>C NMR spectrum (75 MHz, CDCl<sub>3</sub>) of compound **11**.

c1ccccc1Te(c2ccccc2)Te(c3ccccc3)c4ccccc4  
**1m**

<sup>1</sup>H NMR spectrum (CDCl<sub>3</sub>) of compound **1m**. The spectrum shows peaks at 7.3319, 7.3263, 7.3215, 7.3106, 7.3045, 7.2993, 7.2798, 7.2586, 7.2510, 7.2460, 7.2362, 7.2277, 7.2184, 7.2137, 7.1917, 3.3862, 3.3587, 3.3433, 3.3339, 3.3280, 3.3191, 3.3055, 3.2822, 3.0839, 3.0712, 3.0558, 3.0306, 1.5651, 1.2531, 0.0097, 0.0005, and -0.0103 ppm. Integration values are 2.98, 2.47, 2.00, 1.02, and 0.22.

**Current Data Parameters**  
 NAME 2022-09  
 EXPNO 161  
 PROCNO 1

**F2 - Acquisition Parameters**  
 Date\_ 20220929  
 Time\_ 15.08  
 INSTRUM spect  
 PROBHD 5 mm Dual 13C/  
 PULPROG zg30  
 FD 65536  
 SOLVENT CDCl3  
 NS 16  
 DS 2  
 SWH 6172.839 Hz  
 FIDRES 0.094190 Hz  
 AQ 5.3084660 sec  
 RG 574.7  
 DW 81.000 usec  
 DE 6.00 usec  
 TE 293.1 K  
 SI 1.00000000 sec  
 FDO 1

===== CHANNEL f1 =====  
 NUCL 1H  
 P1 9.50 usec  
 PL1 -3.00 dB  
 SFO1 300.1318534 MHz

**F2 - Processing parameters**  
 SI 32768  
 SF 300.1300065 MHz  
 WDW EM  
 SSB 0  
 LB 0.30 Hz  
 GB 0  
 PC 1.00

c1ccccc1[Te](c2ccccc2)[Te](c3ccccc3)c4ccccc4  
**1m**

142.5376  
 128.7975  
 128.4506  
 128.3433  
 127.6969  
 126.5408  
 77.6596  
 77.2364  
 76.8131  
 40.4788  
 38.9441  
 4.9618  
 3.7477  
 0.2255

Current Data Parameters  
 NAME 2022-02  
 EXPNO 106  
 PROCNO 1

F2 - Acquisition Parameters  
 Date\_ 20220225  
 Time\_ 10.17  
 INSTRUM spect  
 PROBHD 5 mm Dual 13C/  
 PULPROG zgpg30  
 TD 65536  
 SOLVENT CDCl3  
 NS 14298  
 DS 4  
 SWH 17985.611 Hz  
 FIDRES 0.274439 Hz  
 AQ 1.8219508 sec  
 RG 18390.4  
 JW 27.800 usec  
 DE 6.00 usec  
 FE 289.2 K  
 D1 2.00000000 sec  
 d11 0.03000000 sec  
 DELTA 1.89999998 sec  
 FDO 1

===== CHANNEL f1 =====  
 VUC1 13C  
 P1 11.00 usec  
 PL1 -1.20 dB  
 SFO1 75.4752953 MHz

===== CHANNEL f2 =====  
 CPDPRG2 waltz16  
 VUC2 1H  
 PCPD2 100.00 usec  
 PL2 -1.00 dB  
 PL12 19.45 dB  
 PL13 23.40 dB  
 SFO2 300.1312005 MHz

**Figure S13b.**  $^{13}\text{C}$  NMR spectrum (75 MHz,  $\text{CDCl}_3$ ) of compound **1m**.
